# Supplementary material for: Germline Testing in a Cohort of Patients at High Risk of Hereditary Cancer Predisposition Syndromes: First Two-Year Results from South Italy
Source: MDPI journal article supplement (doi:10.3390/genes13071286), 2022-07-21
Supplement: s1 [file s1]

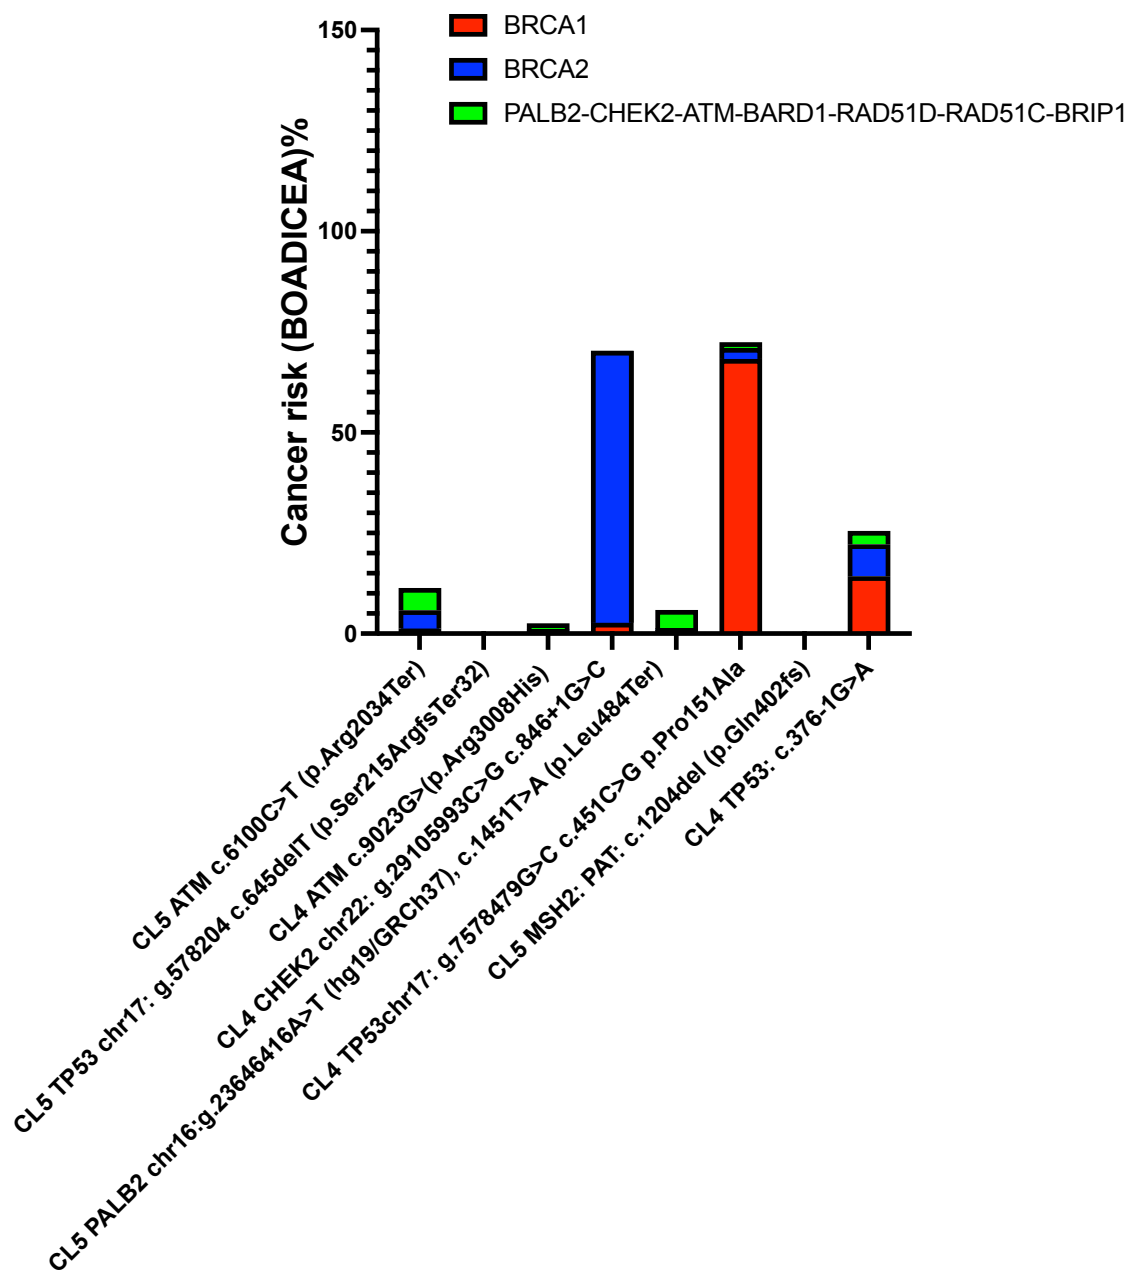

**Supplementary Figure S2:** Likelihood of carrying PVs in non-*BRCA1/2* positive patients evaluated by BOADICEA for *BRCA1* and *BRCA2* and other susceptibility genes.
