# Supplementary material for: Germline Testing in a Cohort of Patients at High Risk of Hereditary Cancer Predisposition Syndromes: First Two-Year Results from South Italy
Source: MDPI journal article supplement (doi:10.3390/genes13071286), 2022-07-21
Supplement: s1 [file s1]

**Supplementary Table S2.** Interpretation of VUS variants using ACMG rules and semiquantitative rules by Sherlock.

| n. | Patient ID | Gene  | Variant                                    | ACMG interpretation       | Sherlock interpretation                                                   |
|----|------------|-------|--------------------------------------------|---------------------------|---------------------------------------------------------------------------|
| 1  | 674/19     | ATM   | c.7475T>G (p.Leu2492Arg)                   | PM2, PP3, BP6: <i>VUS</i> | 1B, 2P: <i>uncertain significance</i>                                     |
| 2  | 348/20     | ATM   | c.3356C>T (p.Ala1119Val)                   | PM2: <i>VUS</i>           | 2,5P: <i>uncertain significance</i>                                       |
| 3  | 704/20     | ATM   | c.7316T>C (p.Val2439Ala)                   | PM2: <i>VUS</i>           | 1,5P,1B: <i>uncertain significance</i>                                    |
| 4  | 87/21      | PALB2 | c.37G>A (p.Glu13Lys)                       | PM2: <i>VUS</i>           | 3P: <i>uncertain significance</i>                                         |
| 5  | 133/21     | CHEK2 | c.911T>C (p.Met304Thr)                     | PM2, PP3: <i>VUS</i>      | 3P: <i>uncertain significance</i>                                         |
| 6  | 150/21     | BRCA1 | c.1344C>G (p.His448Gln)                    | PM2, BP4: <i>VUS</i>      | 2P,1B: <i>uncertain significance</i>                                      |
| 7  | 182/21     | BRCA1 | c.5312C>A (p.Pro1771His)                   | PM1, PM2, PP3: <i>VUS</i> | 3P: <i>uncertain significance</i>                                         |
| 8  | 262/21     | MSH6  | c.2941A>G (p.Ile981Val)                    | PM2, BP4: <i>VUS</i>      | 2P,1B: <i>uncertain significance</i>                                      |
| 9  | 282/21     | CHEK2 | 1312G>T (p.Asp438Tyr)                      | PS3, PM2, BS3: <i>VUS</i> | 2P,1B: <i>uncertain significance</i>                                      |
|    |            | MLH1  | c.678-4A>G                                 | PM2, BP4: <i>VUS</i>      | 1P,1B: <i>uncertain significance</i><br>2P: <i>uncertain significance</i> |
|    |            | MSH6  | c.998C>T (p.Thr333Ile)                     | PM2: <i>VUS</i>           |                                                                           |
| 10 | 310/21     | PALB2 | c.563C>G (p.Ala188Gly)                     | PM2, BP4: <i>VUS</i>      | 2P,1B: <i>uncertain significance</i>                                      |
| 11 | 344/21     | CHEK2 | c.1312G>T (p.Asp438Tyr)                    | PS3, PM2, BS3: <i>VUS</i> | 2P,1B: <i>uncertain significance</i>                                      |
| 12 | 465/21     | ATM   | c.2954A>G (p.Asp985Gly)                    | PM2: <i>VUS</i>           | 2,5P: <i>uncertain significance</i>                                       |
| 13 | 489/21     | MSH6  | c.1311_1312delinsGC(p.437_438delinsGlnLeu) | PM2, PP3: <i>VUS</i>      | 2P: <i>uncertain significance</i>                                         |
| 14 | 620/21     | CHEK2 | c.787G>C (p.Glu263Gln)                     | PM2: <i>VUS</i>           | 2P: <i>uncertain significance</i>                                         |
| 15 | 665/21     | CHEK2 | c.1160C>T (p.Thr387Ile)                    | PM2, PP3: <i>VUS</i>      | 2,5P: <i>uncertain significance</i>                                       |
| 16 | 760/21     | PMS2  | c.328G>T(p.Ala110Ser)                      | PM2, PP3: <i>VUS</i>      | 2,5P: <i>uncertain significance</i>                                       |
| 17 | 761/21     | PMS2  | c.328G>T(p.Ala110Ser)                      | PM2, PP3: <i>VUS</i>      | 2,5P: <i>uncertain significance</i>                                       |
| 18 | 979/21     | CHEK2 | c.-4C>T                                    | BP4, BP7, PM2: LB         | 3B: <i>uncertain significance</i>                                         |
| 19 | 1006/21    | MLH1  | c.2130C>G (p.Asn710Lys)                    | PM2, BP4: <i>VUS</i>      | 1,5P,1B: <i>uncertain significance</i>                                    |
|    |            | ATM   | c.7316T>C (p.Val2439Ala)                   | PM2: <i>VUS</i>           | 1,5P: <i>uncertain significance</i>                                       |
| 20 | 68/22      | ATM   | c.8734A>G (p.Arg2912Gly)                   | PP5, PM2, PP3: <i>VUS</i> | 3P,1B: <i>uncertain significance</i>                                      |
| 21 | 156/22     | BRCA1 | c.1250A>G (p.Asn417Ser)                    | PM2, BP4: <i>VUS</i>      | 2P,1B: <i>uncertain significance</i>                                      |

Detailed sherlock criteria used for the classification are described in reference [46].
